# Supplementary material
Source: PubMed Central journal article supplement (PMC4326753)
Supplement: supp_pp.114.251413_251413suppdata.pdf [file supp_pp.114.251413_251413suppdata.pdf]

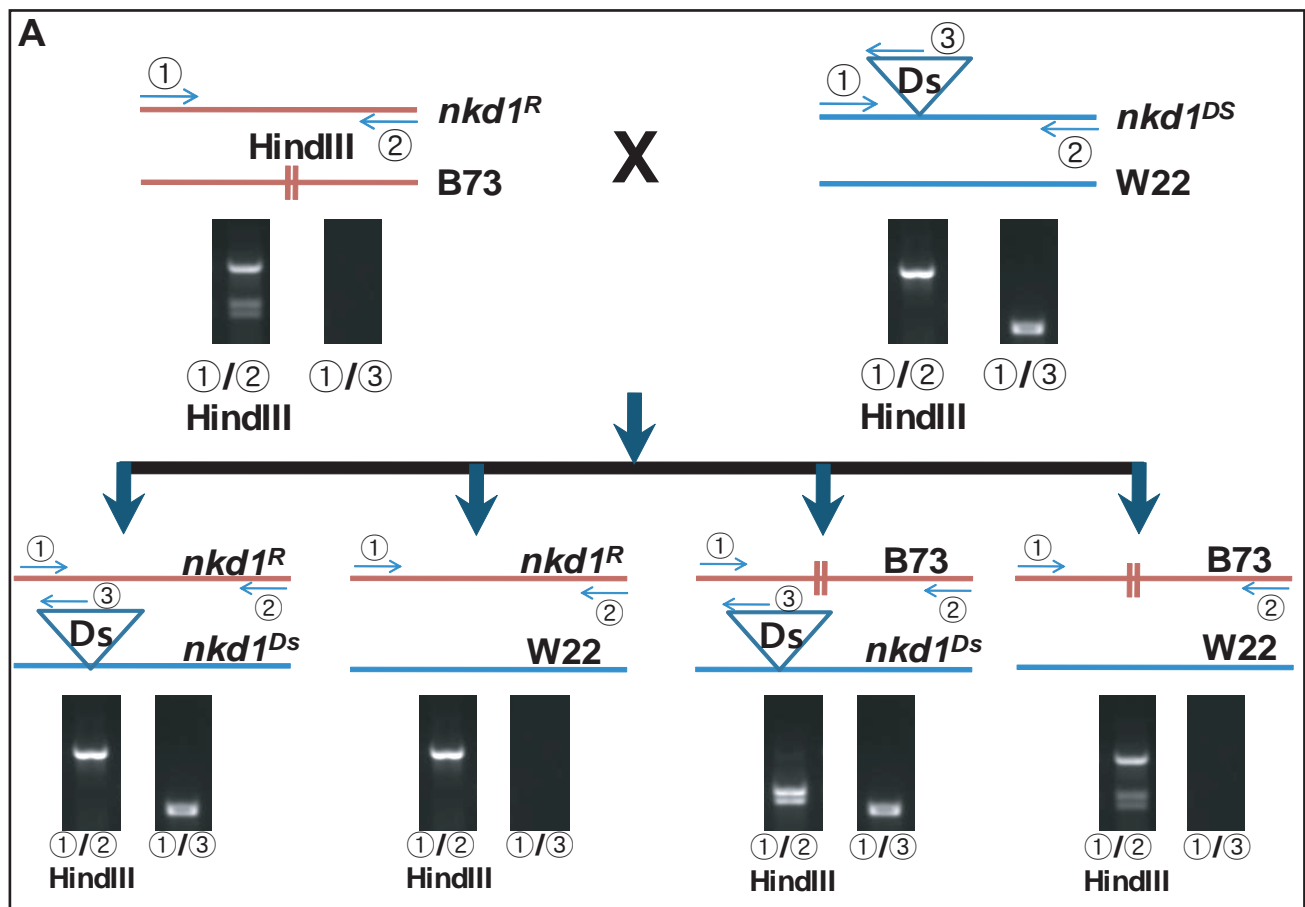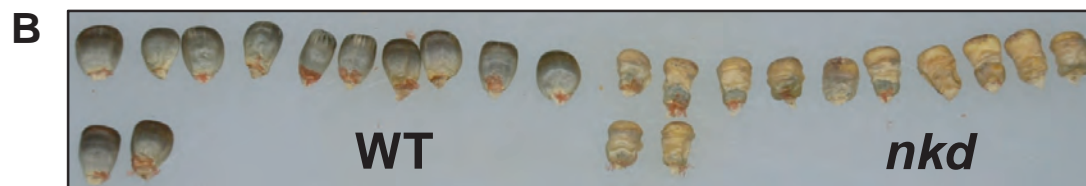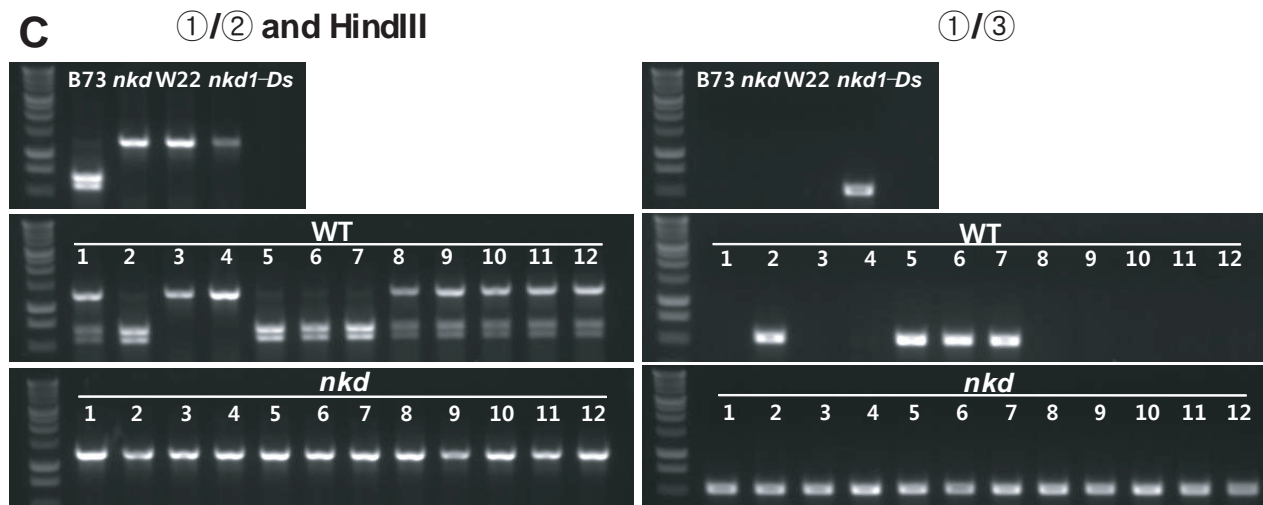

**Supplemental Figure 1.** Complementation test with *nkd1-Ds* allele. **(A)** Cross performed for the complementation test. Note that all the progeny are *nkd2-R/+* heterozygous from the cross of maternal *nkd2-R/nkd2-R* and paternal *+/+*. Four different progeny genotypes were identified by marker analysis. WT *Nkd1-B73* can be distinguished from *nkd1-R* and *Nkd1-W22* by susceptibility to *HindIII* digestion of the PCR product produced by primer pair 1/2. The *Ds* insertion allele was detected by PCR with *Ds*-specific primer 3 and gene specific primer 1. **(B)** Ears derived from the designated cross segregated 3:1 for WT:mut. 12WT kernels and 12 mutant kernels were genotyped. **(C)** Genotyping for 12 WT and 12 *nkd* kernels. All the mutant kernels inherited *nkd1-R*, as indicated by lack of *HindIII* digestion of the maternal allele, and *nkd1-Ds* as indicated by amplification with the *Ds*-specific primer 3. All the WT kernels inherited either the *Nkd1-B73* maternal allele, the *Nkd1-W22* paternal allele or both.

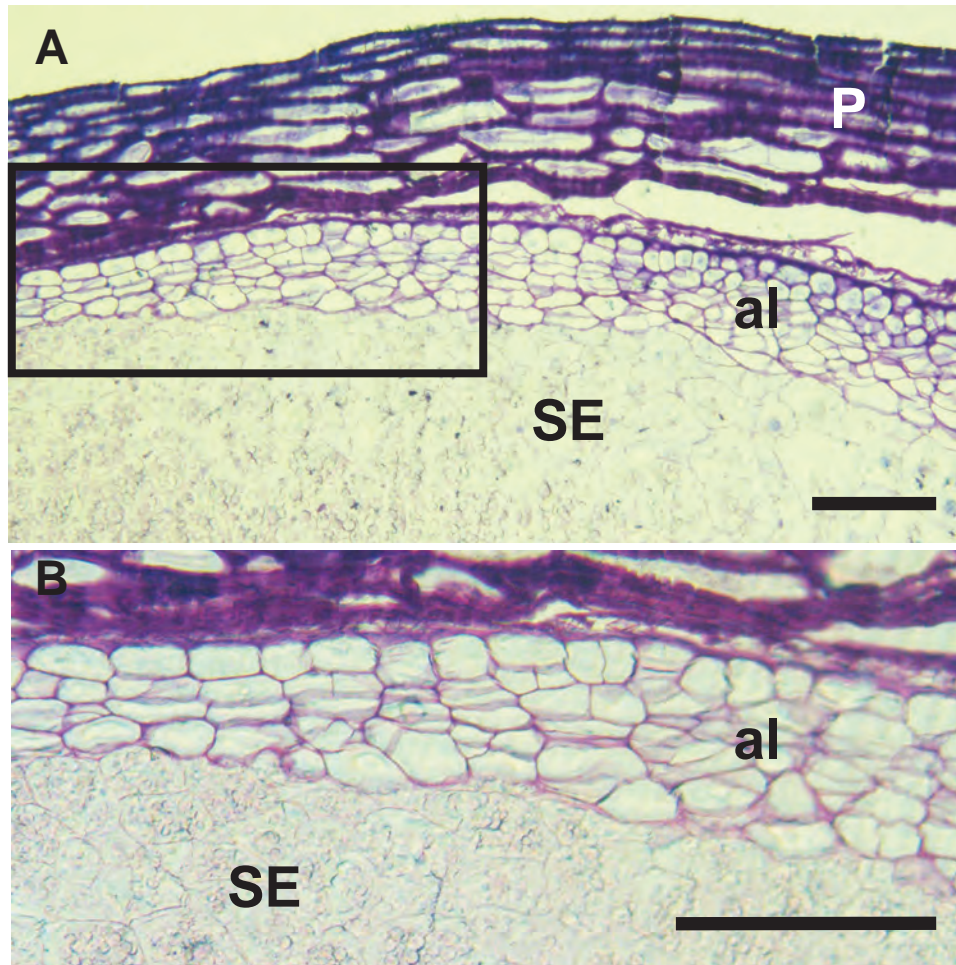

**Supplemental Figure 2.** Endosperm phenotype of a *nkd1-Ds* and *nkd2-Ds0297* double mutant. **(A)** Histological section of a nearly mature kernel showing a phenotype similar to the original *nkd1-R; nkd2-R* mutant. The multiple layers of peripheral cells are highly vacuolated rather than showing the dense cytoplasm characteristic of normal aleurone cells. **(B)** Increased magnification of inset in (A). SE, starchy endosperm; P, pericarp; “al”, abnormal aleurone cells. Size bars = 100  $\mu$ m.

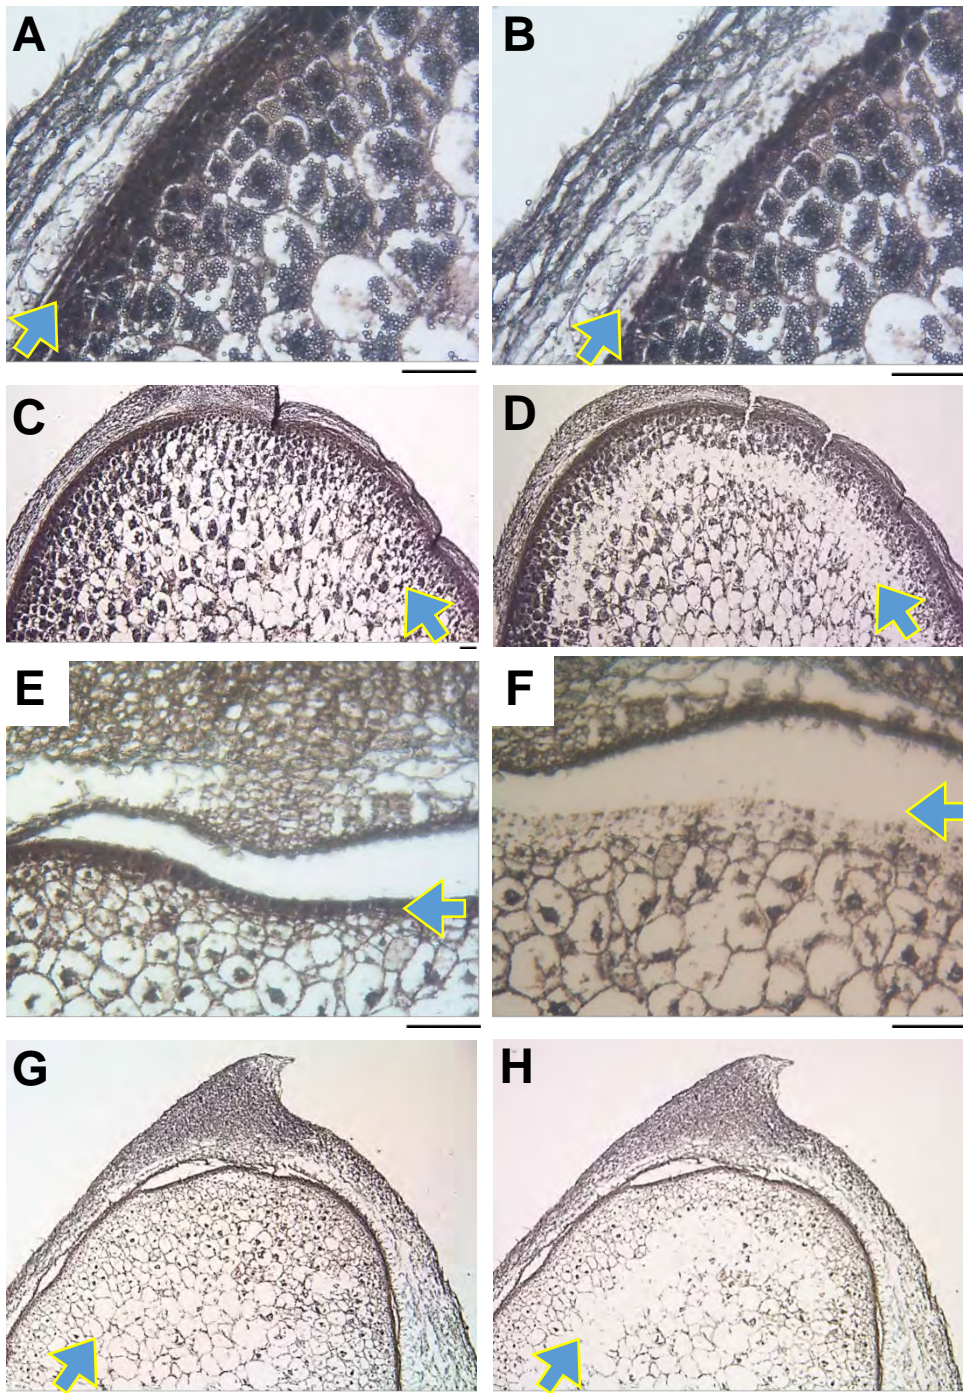

**Supplemental Figure 3.** Laser capture microdissection (LCM) of aleurone (AL), and starchy endosperm (SE) cells.

B73 WT and *nkd* mutant kernels (in B73 background) were collected at 15DAP, fixed and paraffin embedded before sectioning and LCM. **A-D** depict sections of B73 WT kernels before (**A, C**) and after (**B, D**) capture of aleurone (**A,B**) and starchy endosperm cells (**C,D**). **E, F, G** and **H** show *nkd* mutant sections before (**E, G**) and after (**F, H**) capture. Captured cells are denoted by arrows. Scale bars represent 100 $\mu$ m.

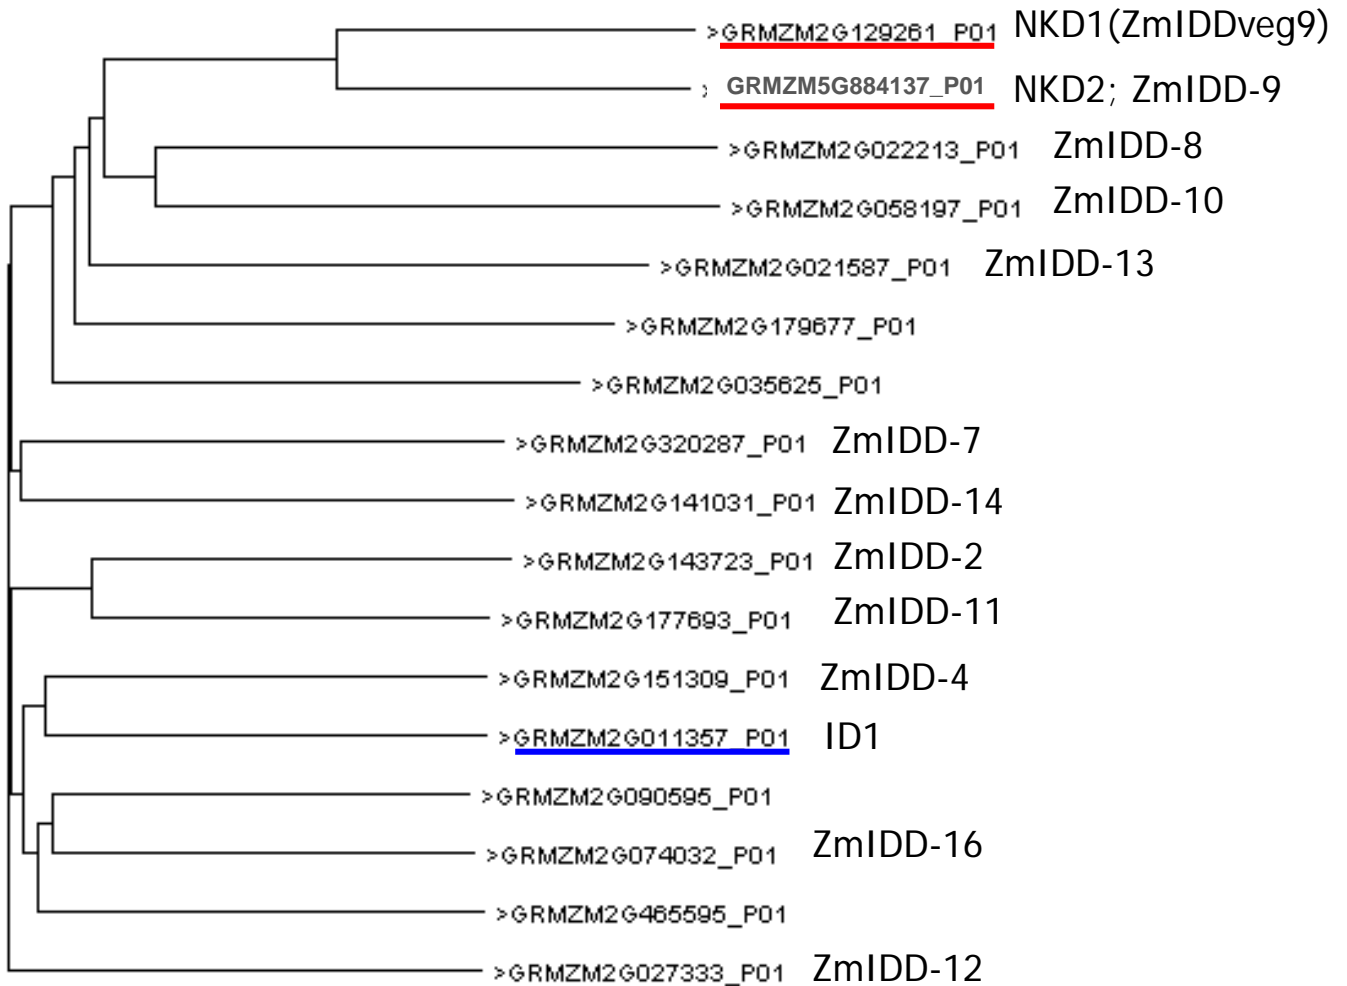

**Supplemental Figure 4.** The IDD protein family in maize.

Gene sequences were identified by searching the reference maize genome B73 v.2 with BLASTP using the IDD region of ID1 as a query. Protein sequences were aligned with ClustalW and the phylogeny was produced with MEGA4 using default parameters of the UPGMA method.

**Table S1.** Marker data for *nkd1* positional cloning on chromosome 2.

| Marker                  | Forward primer;<br>Reverse primer                     | Position on<br>IBM7 (cM) | Mapping<br>Population | Maker Type | No.<br>Recombinant         |
|-------------------------|-------------------------------------------------------|--------------------------|-----------------------|------------|----------------------------|
| IDP7746 <sup>a</sup>    | CTCGTACCGAGCTATCACCC;<br>CAAGTTAGGAGCCGTCAAGC         | 52.8                     | H99xnkd F2            | dominant   | 15/120~30/120 <sup>b</sup> |
| 491I18-<br>7h99         | CAGCTAAAAGTGGGAGCGCGC;<br>TGCTAGTGCTAGTGCTACCTAT      | nd <sup>c</sup>          | H99xnkd F2            | dominant   | 11/218~22/218              |
| 190B15-6,7              | ACGTGCCTCTGACATGTGGGTAC;<br>CCGATCTCTTGCGATGCATCGAG   | nd                       | H99xnkd F2            | dominant   | 16/338~32/338              |
| 190B15-3,2              | CACTTGCACCTATCCAAAATTCTCT;<br>TGTCTCCGGTGCTCTTAATGATG | nd                       | H99xnkd F2            | dominant   | 2/118~4/118                |
| 266H09-<br>9,10         | CGTGAGCTGGACATTTTACAG;<br>GTGCATACGGGTCTTCATAGTAC     | nd                       | H99xnkd F2            | codominant | 5/328                      |
| <i>nkd1</i><br>position |                                                       |                          |                       |            |                            |
| 166I20-1,5              | AGAACGAGAAGGGGACCTCATAA;<br>TCCCTCCATTCCATTGATTAAGATG | nd                       | H99xnkd F2            | codominant | 2/332                      |
| IDP1612                 | AATTGCACATAACAGAGGCG;<br>CTCTTCCAATCGGGTTTGC          | 65.9                     | H99xnkd F2            | codominant | 2/120                      |
| IDP668                  | GCTCCGAACCTTTGAAAGAGG;<br>CGCCGTAATTTACAACCAGC        | 67.3                     | H99xnkd F2            | codominant | 2/124                      |
| IDP7439                 | ATGCTTCTCATCAGGTTGGG;<br>TGATCTCACTCGACACAGGC         | 73.6                     | H99xnkd F2            | codominant | 3/122                      |
| IDP2485                 | GAGCTGTGCATTCAAACACG;<br>GAGCAGCATCTCCGAGTACC         | 75.4                     | H99xnkd F2            | codominant | 7/124                      |

<sup>a</sup> Information on IDP makers comes from Fu et al. 2006.

<sup>b</sup> Because of the dominant nature of the marker, heterozygotes could not be distinguished from homozygotes. Therefore a range of possible recombinant frequencies is presented.

<sup>c</sup> nd: not determined

**Table S2.** Marker data for *nkd1* positional cloning on chromosome 10.

| Maker                   | Forward primer;<br>Reverse primer              | Position on<br>IBM7 (cM) | Mapping<br>Population                    | Maker Type | No.<br>Recombinant |
|-------------------------|------------------------------------------------|--------------------------|------------------------------------------|------------|--------------------|
| IDP3853 <sup>a</sup>    | AATCTGCGCAATCCATAACC;<br>CTCTCGCTTGTTTCTGTAGCC | 65.5                     | H99xnkd F2                               | codominant | 38/92              |
| IDP8518                 | CTTGGTGAAGGTCTCGAAGC;<br>ACCTGTACCTGACCGTGGG   | 65.5                     | Mo17xnkd F2                              | codominant | 8/72               |
| IDP1978                 | ACGACCGAATGTTGCTAAGG;<br>TGGCAGAGTGATCTTTGTCG  | 71.4                     | H99xnkd F2<br>(Mo17xnkd F2) <sup>b</sup> | codominant | 40/122<br>(8/78)   |
| IDP8526                 | GAAGGCCTACGACATGAACC;<br>TGGTAGTCCTGGAAGTTGGC  | 74.4                     | H99xnkd F2                               | codominant | 11/330             |
| <i>nkd2</i><br>position |                                                |                          |                                          |            |                    |
| IDP8334                 | CTCAACCAAGAGAGCGTGCC;<br>GAGATGATTCTCCAGGCTGC  | 76.4                     | H99xnkd F2<br>(Mo17xnkd F2)              | codominant | 6/328<br>(6/76)    |
| IDP250                  | TGGGAACAATTCTCCAAACC;<br>AAGAGGCACTCCAACATTCC  | 92.1                     | H99xnkd F2                               | codominant | 9/90               |
| IDP7345                 | CGGTGACTGCCTACATTGG;<br>AGCTCTTCACAGGCAGAAGC   | 99.8                     | Mo17xnkd F2                              | codominant | 20/70              |

<sup>a</sup> Information on IDP makers come from Fu et al. 2006

<sup>b</sup> In several cases, multiple populations were used. The secondary population and corresponding recombination data are shown parenthetically.

**Table S3.** PCR primers used in this study

| <b>Primer</b>  | <b>Sequence</b>                          | <b>Use</b>            |
|----------------|------------------------------------------|-----------------------|
| 491I18-7h99f   | CAGCTAAAAGTGGGAGCGCGC                    | Mapping               |
| 491I18-7h99r   | TGCTAGTGCTAGTGCTACCTAT                   | Mapping               |
| 190B15-6       | ACGTGCCTCTGACATGTGGGTCAC                 | Mapping               |
| 190B15-7       | CCGATCTCTTGCGATGCATCGAG                  | Mapping               |
| 266H09-9       | CGTGAGCTGGACATTTTACAG                    | Mapping               |
| 266H09-10      | GTGCATACGGGTCTTCATAGTAC                  | Mapping               |
| 166I20-1       | AGAACGAGAAGGGGACCTCATAA                  | Mapping               |
| 166I20-5       | TCCCTCCATTCCATTGATTAAGATG                | Mapping               |
| 2ZNF-Xba1*     | <i>acgttctag</i> ATGGCATCGAATTCATCGGCG   | GFP fusion            |
| 2ZNF-BamH1*    | <i>tgacggatcc</i> TGGCATCCTGCCTCCGTTGAAG | GFP fusion            |
| 10ZNF-Xba1*    | <i>acgttctag</i> ATGGCGTGAATTCACCGGCG    | GFP fusion            |
| 10ZNF-BamH1*   | <i>tgacggatcc</i> TGGCATCCTGCCTCCATTGAAG | GFP fusion            |
| 10ZNF3EF-Avr2* | <i>aggcctagg</i> GAGGGACAGCTTCATCAG      | RNAi                  |
| 10ZNF3ER-Asc1* | <i>tcaggcgcgcc</i> TCATGGCATCCTGCCTCCA   | RNAi                  |
| 10ZNF3EF-Xma1* | <i>tcacccggg</i> GAGGGACAGCTTCATCAG      | RNAi                  |
| 10ZNF3ER-Spe1* | <i>aggactagt</i> TCATGGCATCCTGCCTCCA     | RNAi                  |
| 291F22-5       | CATATATGAGTCTGCGGGTG                     | RT PCR                |
| 291F22-7       | TGCTGCCGCAGATGTCGGCGACA                  | RT PCR                |
| 291F22-8       | TCGGTCATGGCATCCTGCCTCCG                  | RT PCR,<br>genotyping |
| 2ZNF-5         | GATTCCGGTCGTGCATGCACACTGC                | RT PCR                |
| 2ZNF-8         | CTGTGTGACATGGAGCACGAGGT                  | RT PCR                |
| 10ZNF-12       | TACCGCTGCGACTGCGGCACGC                   | RT PCR                |
| 10ZNF-13       | AGGCTTGTTGGCCTGCAGCTGAA                  | RT PCR                |
| 10ZNF-17       | CGACATGGCGGAGCGCGAGGG                    | RT PCR                |
| 10ZNF-2        | TCTGTCATGGCATCCTGCCTCCA                  | RT PCR                |
| Nkd2F209       | CTCTGACTAATGGAGCAGTAAGCTG                | RT PCR                |
| Nkd2R317       | CAACAAGAACGAGACCAGCAGAAT                 | RT PCR                |

|           |                            |            |
|-----------|----------------------------|------------|
| VP1-RT3   | CTTCAGATAAGCGGCAGGG        | RT PCR     |
| VP1-RT4   | CCAAAACCTGTACCGCATG        | RT PCR     |
| Waxy GK-1 | CCAGTTCAAATTCTTTTAGGCTCACC | RT PCR     |
| 2ZNF-4    | TATCTTATCCGTCGATGCGTTG     | Genotyping |
| JS-R01    | GTTCGAAATCGATCGGGATA       | Genotyping |

\* Additional sequences were written in lower case and restriction enzyme sites are *italic*.

## SUPPLEMENTAL METHODS

### Kernel Genotyping

For the genotyping shown in Supplemental Figure 1, 12 WT kernels and 12 mutant kernels from a cross between *nkd1-R/+; nkd2-R/nkd2-R* in B73 background and *nkd1-Ds/+; +/+* in W22 background were genotyped. Four different progeny genotypes of *Nkd1* locus were identified by two different PCR reactions and following *HindIII* digestion for one of them. WT *Nkd1-B73* was distinguished from *nkd1-R* and *Nkd1-W22* by susceptibility to *HindIII* digestion of the PCR product of a primer pair 2ZNF-4 and 291F22-8. The *nkd1-Ds* allele was detected by PCR with *Ds* specific primer JS-R01 (Ahern et al., 2009) and gene specific primer 2ZNF-4.
